# Supplementary material for: Proteasome-targeted nanobodies alleviate pathology and functional decline in an α-synuclein-based Parkinson’s disease model
Source: PubMed Central journal article supplement (PMC6105584; doi:10.1038/s41531-018-0062-4), 2018-08-22
Supplement: 41531_2018_62_MOESM1_ESM.pdf [file 41531_2018_62_MOESM1_ESM.pdf]

22 **Supplemental figures**

23

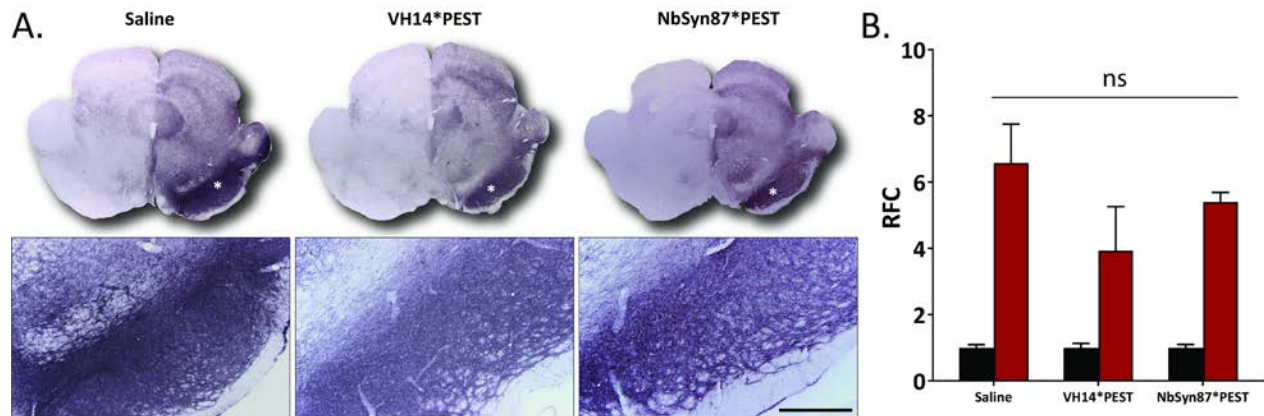

24

25

26 *Figure S1.*

27  $\alpha$ -Syn expression levels in the substantia nigra are not significantly reduced post-intrabody

28 treatment. **A)** Immunolabeling of human specific  $\alpha$ -syn (LB509) in the substantia nigra. **B)**

29 Densitometric quantification of LB509 labeling reveals decreases in intrabody treated-cohorts,

30 but not at statistically significant levels. The data were analyzed via one-way ANOVA with

31 Tukey post-hoc comparisons (n=7 for all groups).

32

## LB509

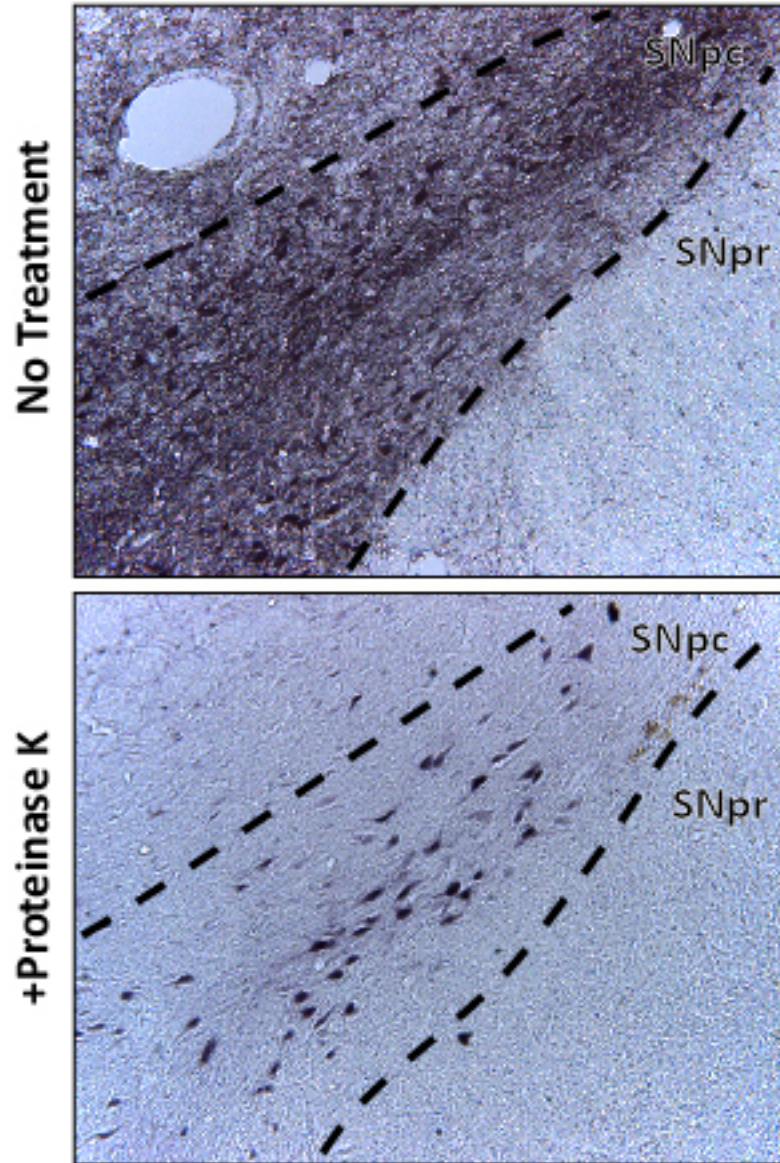

33

34 *Figure S2.*

35 AAV5- $\alpha$ -Syn over expression in the substantia nigra pars compacta induces pathologic, insoluble

36 Lewy-body like cellular inclusions that are resistant to proteinase K digestion.

37

| <b>Antibody Type</b>      | <b>Antibody</b>          | <b>Species</b> | <b>Company</b> | <b>Catalog #</b> | <b>Dilution</b> |
|---------------------------|--------------------------|----------------|----------------|------------------|-----------------|
| <b>Primary Antibody</b>   | pS129 alpha-synuclein    | Rabbit         | Abcam          | ab51253          | 1:500           |
|                           | LB509 alpha-synuclein    | Mouse          | Thermo Fischer | 180215           | 1:500           |
|                           | Tyrosine Hydroxylase     | Rabbit         | Immunostar     | 202984           | 1:5000          |
|                           | DAT                      | Rabbit         | EMD Millipore  | MAB369           | 1:200           |
|                           | Hemagglutinin            | Mouse          | Covance        | MMS-101P         | 1:1000          |
|                           | Iba-1                    | Rabbit         | Wako           | 019-19741        | 1:2500          |
| <b>Secondary Antibody</b> | Biotin. Goat Anti-rabbit | Goat           | Vector Labs    | BA-1000          | 1:200           |
|                           | Biotin. Horse Anti-mouse | Horse          | Vector Labs    | BA-2000          | 1:200           |

39

40 *Table S1.*

41 List of primary and secondary antibodies used for immunohistochemistry and analysis.
